# Supplementary material for: Prematurity negatively affects regenerative properties of human amniotic epithelial cells in the context of lung repair
Source: Oxford University Press journal article supplement (doi:10.1042/cs20200859), 2020-10-01
Supplement: cs-2020-0859_supp.pdf [file cs-2020-0859_supp.pdf]

**Supplementary Table 1: Targeted genes and their assay ID in TaqMan assays:**

| <b>Human TaqMan Assays</b> |                        |
|----------------------------|------------------------|
| <b>Gene name</b>           | <b>TaqMan assay ID</b> |
| WNT1                       | Hs01011247_m1          |
| WNT2                       | Hs00608224_m1          |
| WNT2B                      | Hs00921614_m1          |
| WNT3                       | Hs00902257_m1          |
| WNT3A                      | Hs00263977_m1          |
| WNT4                       | Hs01573504_m1          |
| WNT5A                      | Hs00998537_m1          |
| WNT5B                      | Hs01086864_m1          |
| WNT6                       | Hs00362452_m1          |
| WNT7A                      | Hs00171699_m1          |
| WNT7B                      | Hs00536497_m1          |
| WNT8A                      | Hs00230534_m1          |
| WNT8B                      | Hs00610126_m1          |
| WNT9A                      | Hs00243321_m1          |
| WNT9B                      | Hs00287409_m1          |
| WNT10A                     | Hs00228741_m1          |
| WNT10B                     | Hs00559664_m1          |
| WNT11                      | Hs00182986_m1          |
| WNT16                      | Hs00365138_m1          |
| MYC                        | Hs00153408_m1          |
| GAPDH                      | Hs02758991_g1          |

  

| <b>Mouse TaqMan Assays</b> |                        |
|----------------------------|------------------------|
| <b>Gene name</b>           | <b>TaqMan assay ID</b> |
| APC                        | Mm00545872_m1          |
| AXIN1                      | Mm01299060_m1          |
| AXIN2                      | Mm00443610_m1          |
| $\beta$ -Catenin           | Mm00458117_m1          |
| BMP4                       | Mm00432087_m1          |
| BRCA1                      | Mm00515386_m1          |
| CCND1                      | Mm00432359_m1          |
| CCND2                      | Mm00438070_m1          |
| CCND3                      | Mm01612362_m1          |
| CDC42                      | Mm01194005_g1          |
| CDK4                       | Mm00726334_s1          |
| CSNK1G2                    | Mm00506098_m1          |
| DKK1                       | Mm00438422_m1          |
| DKK2                       | Mm01322146_m1          |
| DKK4                       | Mm00461141_m1          |
| DVL1                       | Mm00438592_m1          |

|              |               |
|--------------|---------------|
| DVL2         | Mm00432899_m1 |
| DVL3         | Mm00432914_m1 |
| EFNB2        | Mm00438670_m1 |
| Elf2s3y      | Mm01210630_m1 |
| FGF1         | Mm00438906_m1 |
| FGF2         | Mm00433287_m1 |
| FGF4         | Mm00438917_m1 |
| FGF7         | Mm00433291_m1 |
| FGF8         | Mm00438922_m1 |
| FGF9         | Mm00442795_m1 |
| FGFR1        | Mm00438930_m1 |
| FGFR2        | Mm01269930_m1 |
| FGFR3        | Mm00433294_m1 |
| FGFR4        | Mm01341852_m1 |
| FOXA2        | Mm01976556_s1 |
| FRZB (SFRP3) | Mm00441378_m1 |
| FZD1         | Mm00445405_s1 |
| FZD2         | Mm02524776_m1 |
| FZD3         | Mm00445423_m1 |
| FZD4         | Mm00433382_m1 |
| FZD5         | Mm00445623_s1 |
| FZD6         | Mm00433387_m1 |
| FZD7         | Mm00433409_m1 |
| FZD8         | Mm01234717_s1 |
| FZD9         | Mm01206511_s1 |
| FZD10        | Mm00558396_s1 |
| GATA6        | Mm00802636_m1 |
| GRB2         | Mm03023989_g1 |
| GSK3 $\beta$ | Mm00444911_m1 |
| IL1A         | Mm00439620_m1 |
| IL1B         | Mm00434228_m1 |
| IL6          | Mm00446190_m1 |
| KCNMA1       | Mm01268569_m1 |
| KDR          | Mm01222421_m1 |
| KREMEN1      | Mm00459616_m1 |
| KREMEN2      | Mm01309205_m1 |
| HGF          | Mm01135193_m1 |
| LEF1         | Mm00550265_m1 |
| LRP5         | Mm01227476_m1 |
| LRP6         | Mm00999795_m1 |
| MYCBP        | Mm01192721_m1 |
| MYCL         | Mm03053598_s1 |
| MYCN         | Mm00476449_m1 |

|               |               |
|---------------|---------------|
| MST1R         | Mm00436382_m1 |
| NMI           | Mm00803857_m1 |
| PAK3          | Mm01332263_m1 |
| PECAM1        | Mm01242576_m1 |
| PLCG1         | Mm01247293_m1 |
| PLK3C2G       | Mm00440781_m1 |
| RARA          | Mm01296312_m1 |
| RARB          | Mm01319677_m1 |
| RARRES1       | Mm01220691_m1 |
| RARRES2       | Mm00503579_m1 |
| RLF           | Mm01181427_m1 |
| RSPO1         | Mm00507077_m1 |
| RXRB          | Mm00441193_m1 |
| SFRP1         | Mm00489161_m1 |
| SFRP2         | Mm01213947_m1 |
| SFRP4         | Mm00840104_m1 |
| SFRP5         | Mm01194236_m1 |
| SOSTDC1(WISE) | Mm03024258_s1 |
| SRC           | Mm00436785_m1 |
| TCF7          | Mm00493445_m1 |
| TCF7L1        | Mm01188711_m1 |
| TCF7L2        | Mm00501505_m1 |
| TGFA          | Mm00446232_m1 |
| TGFB1         | Mm00441724_m1 |
| TGFB2         | Mm00436955_m1 |
| TGFB3         | Mm00436960_m1 |
| TGIF1         | Mm01227699_m1 |
| THBS1         | Mm00449032_g1 |
| TNF           | Mm00443258_m1 |
| VEGFA         | Mm00437304_m1 |
| WASF2         | Mm00463191_m1 |
| WIF1          | Mm00442355_m1 |
| YAP1          | Mm01143263_m1 |
| ID2           | Mm00711781_m1 |
| BIRC5         | Mm00599749_m1 |
| CTGF          | Mm01192933_g1 |
| SMAD7         | Mm00484742_m1 |
| SMAD2         | Mm00487530_m1 |
| SMAD3         | Mm01170760_m1 |
| SMAD4         | Mm03023996_m1 |
| LATS1         | Mm01191886_m1 |
| LATS2         | Mm01321138_m1 |
| GAPDH         | Mm03302249_g1 |

**Supplementary Table 2: miRNAs expressed at 2-fold or higher in term hAECs compared to preterm hAECs**

| <b>Gene name</b> | <b>Fold change (Term Vs Preterm hAECs)</b> |
|------------------|--------------------------------------------|
| hsa-let-7f       | 73.9252724                                 |
| hsa-miR-624      | 11.9606178                                 |
| hsa-miR-501-5p   | 11.5893119                                 |
| hsa-miR-1267     | 9.40703942                                 |
| hsa-miR-10a      | 9.33998835                                 |
| hsa-miR-30a-5p   | 9.23908353                                 |
| hsa-miR-769-3p   | 6.09007502                                 |
| hsa-miR-765      | 5.9368267                                  |
| hsa-miR-616      | 5.93591322                                 |
| hsa-miR-622      | 5.80398986                                 |
| hsa-miR-614      | 5.75760573                                 |
| hsa-miR-936      | 5.72195043                                 |
| hsa-miR-302d     | 4.83553578                                 |
| hsa-miR-335      | 4.73486978                                 |
| hsa-miR-1260     | 4.67596701                                 |
| hsa-miR-320B     | 4.64558651                                 |
| hsa-miR-1290     | 4.63298416                                 |
| hsa-miR-100      | 4.58483479                                 |
| hsa-miR-1291     | 4.5791212                                  |
| hsa-miR-135b     | 4.56791799                                 |
| hsa-miR-205      | 4.56299398                                 |
| hsa-miR-146b-5p  | 4.52565544                                 |
| hsa-miR-654-5p   | 3.10642021                                 |
| hsa-miR-345      | 3.03995507                                 |
| hsa-miR-362-3p   | 3.01261017                                 |
| hsa-miR-34a      | 3.01110705                                 |
| hsa-miR-590-3P   | 2.98324197                                 |
| hsa-miR-604      | 2.97292486                                 |
| hsa-miR-496      | 2.96894013                                 |
| hsa-miR-500      | 2.96631334                                 |
| hsa-miR-515-3p   | 2.96351426                                 |
| hsa-miR-483-5p   | 2.96316713                                 |
| hsa-miR-638      | 2.96307676                                 |
| hsa-miR-491-5p   | 2.96063779                                 |
| hsa-miR-886-5p   | 2.95575768                                 |
| hsa-miR-548E     | 2.95336568                                 |
| hsa-miR-653      | 2.95306682                                 |
| hsa-miR-886-3p   | 2.95226863                                 |
| hsa-miR-580      | 2.94765361                                 |
| hsa-miR-875-5p   | 2.94732264                                 |

|                |            |
|----------------|------------|
| hsa-miR-548L   | 2.94185471 |
| hsa-miR-652    | 2.93768967 |
| hsa-miR-520g   | 2.9331686  |
| hsa-miR-942    | 2.93215018 |
| hsa-miR-572    | 2.93123168 |
| hsa-miR-603    | 2.93006161 |
| hsa-miR-601    | 2.92240879 |
| hsa-miR-483-3p | 2.91913716 |
| hsa-miR-550    | 2.91420628 |
| hsa-miR-660    | 2.91405276 |
| hsa-miR-532-3p | 2.91197102 |
| hsa-miR-564    | 2.89349069 |
| hsa-miR-9      | 2.88646754 |
| hsa-miR-625    | 2.86010874 |
| hsa-miR-429    | 2.85665141 |
| hsa-miR-1244   | 2.4558335  |
| hsa-miR-1274B  | 2.45036175 |
| hsa-miR-24     | 2.41474149 |
| hsa-miR-126    | 2.40232568 |
| hsa-miR-1248   | 2.39443579 |
| hsa-miR-21     | 2.39229574 |
| hsa-miR-27b    | 2.38572168 |
| hsa-miR-125b   | 2.38510826 |
| hsa-miR-200a   | 2.38357455 |
| hsa-miR-339-3p | 2.36985986 |
| hsa-miR-16     | 2.36078678 |
| hsa-miR-190b   | 2.35740682 |
| hsa-miR-182    | 2.35422425 |
| hsa-miR-1282   | 2.34712512 |
| hsa-miR-183    | 2.34537522 |
| hsa-miR-29a    | 2.34277881 |
| hsa-miR-148b   | 2.33849404 |
| hsa-miR-302a   | 2.3347608  |
| hsa-miR-210    | 2.33292956 |
| hsa-miR-136    | 2.33038569 |
| hsa-miR-15a    | 2.31586435 |
| hsa-miR-26a    | 2.31559789 |
| hsa-let-7a     | 2.3138683  |
| hsa-miR-24-2   | 2.31292863 |
| hsa-miR-135b   | 2.31255512 |
| hsa-miR-184    | 2.3124926  |
| hsa-miR-151-3p | 2.31168328 |
| hsa-miR-1303   | 2.30981251 |

|                 |            |
|-----------------|------------|
| hsa-miR-125a-5p | 2.30917378 |
| hsa-miR-30d     | 2.30753055 |
| hsa-miR-33a     | 2.30252808 |
| hsa-miR-21      | 2.29932237 |
| hsa-miR-1285    | 2.29742498 |
| hsa-miR-126     | 2.29467963 |
| hsa-miR-1243    | 2.29330581 |
| hsa-miR-203     | 2.29226645 |
| hsa-let-7b      | 2.29098935 |
| hsa-miR-152     | 2.28618595 |
| hsa-miR-23a     | 2.27398344 |
| hsa-miR-193b    | 2.26861493 |
| hsa-miR-148b    | 2.24852161 |
| hsa-miR-206     | 2.24723773 |
| hsa-miR-338-5P  | 2.15202934 |
| hsa-miR-193a-5p | 2.0961773  |

**Supplementary Table 3: Pathways union of 22 most upregulated miRNAs in term hAECs compared to preterm hAECs**

| <b>KEGG pathway</b>                                      | <b>p-value</b> | <b>#genes</b> | <b>#miRNAs</b> |
|----------------------------------------------------------|----------------|---------------|----------------|
| Hippo signaling pathway                                  | 1.87e-10       | 97            | 11             |
| Proteoglycans in cancer                                  | 2.22e-16       | 128           | 10             |
| Lysine degradation                                       | 3.22e-10       | 27            | 8              |
| Adherens junction                                        | 2.43e-09       | 49            | 8              |
| Glioma                                                   | 1.2e-10        | 42            | 7              |
| Transcriptional misregulation in cancer                  | 2.92e-06       | 68            | 7              |
| Colorectal cancer                                        | 4.26e-07       | 42            | 5              |
| Central carbon metabolism in cancer                      | 0.000551468    | 35            | 5              |
| Oocyte meiosis                                           | 0.01050969     | 52            | 5              |
| Fatty acid biosynthesis                                  | 0              | 4             | 4              |
| Pathways in cancer                                       | 0              | 170           | 4              |
| Fatty acid metabolism                                    | 2.46e-14       | 12            | 4              |
| ECM-receptor interaction                                 | 2.25e-07       | 41            | 4              |
| Viral carcinogenesis                                     | 1.69e-05       | 76            | 4              |
| Pancreatic cancer                                        | 3.84e-05       | 39            | 4              |
| Cell cycle                                               | 0.001057385    | 56            | 4              |
| p53 signaling pathway                                    | 0.008877096    | 31            | 4              |
| TGF-beta signaling pathway                               | 0.009077201    | 23            | 4              |
| Bladder cancer                                           | 0.0303866      | 27            | 4              |
| Chronic myeloid leukemia                                 | 8.52e-07       | 36            | 3              |
| Steroid biosynthesis                                     | 1.08e-06       | 13            | 3              |
| MicroRNAs in cancer                                      | 2.61e-05       | 31            | 3              |
| Signaling pathways regulating pluripotency of stem cells | 0.000101375    | 56            | 3              |
| Hepatitis B                                              | 0.000116071    | 65            | 3              |
| Non-small cell lung cancer                               | 0.00106916     | 19            | 3              |
| Wnt signaling pathway                                    | 0.001600731    | 34            | 3              |
| Mucin type O-Glycan biosynthesis                         | 0.01146427     | 15            | 3              |
| Prostate cancer                                          | 0.01627984     | 41            | 3              |
| Endometrial cancer                                       | 0.01806197     | 24            | 3              |
| Protein processing in endoplasmic reticulum              | 0.03844125     | 64            | 3              |

|                                                        |             |    |   |
|--------------------------------------------------------|-------------|----|---|
| Melanoma                                               | 0.05479326  | 29 | 3 |
| Thyroid hormone signaling pathway                      | 0.07510067  | 43 | 3 |
| MAPK signaling pathway                                 | 0.2362782   | 55 | 3 |
| Thyroid cancer                                         | 0.2421421   | 17 | 3 |
| RNA transport                                          | 0.2476021   | 47 | 3 |
| Arrhythmogenic right ventricular cardiomyopathy (ARVC) | 0.2902186   | 14 | 3 |
| Epstein-Barr virus infection                           | 0.8280952   | 69 | 3 |
| Small cell lung cancer                                 | 0.001958015 | 39 | 2 |
| ErbB signaling pathway                                 | 0.2967561   | 20 | 2 |
| HIF-1 signaling pathway                                | 0.4232772   | 20 | 2 |
| Estrogen signaling pathway                             | 0.5800298   | 15 | 2 |
| Prolactin signaling pathway                            | 0.7940552   | 12 | 2 |
| Base excision repair                                   | 0.9166133   | 9  | 2 |
| Ribosome                                               | 0.9359495   | 27 | 2 |
| Circadian rhythm                                       | 0.9375584   | 12 | 2 |
| PI3K-Akt signaling pathway                             | 0.9446857   | 81 | 2 |
| Endocytosis                                            | 0.955366    | 42 | 2 |
| Parkinson's disease                                    | 0.965306    | 11 | 2 |
| Pyrimidine metabolism                                  | 0.9999214   | 11 | 2 |
| Acute myeloid leukemia                                 | 0.02043816  | 16 | 1 |
| Renal cell carcinoma                                   | 0.03886262  | 13 | 1 |
| FoxO signaling pathway                                 | 0.2141295   | 32 | 1 |
| HTLV-I infection                                       | 0.2418832   | 21 | 1 |
| Ubiquitin mediated proteolysis                         | 0.2485583   | 42 | 1 |
| Biotin metabolism                                      | 0.6066103   | 1  | 1 |
| Basal cell carcinoma                                   | 0.7988809   | 15 | 1 |
| Ras signaling pathway                                  | 0.8403023   | 20 | 1 |
| Bacterial invasion of epithelial cells                 | 0.8754792   | 15 | 1 |
| Focal adhesion                                         | 0.9008744   | 18 | 1 |
| Spliceosome                                            | 0.9298831   | 14 | 1 |
| TNF signaling pathway                                  | 0.9391868   | 10 | 1 |
| Shigellosis                                            | 0.9656469   | 7  | 1 |
| Leukocyte transendothelial migration                   | 0.9689753   | 5  | 1 |
| Apoptosis                                              | 0.9782784   | 17 | 1 |



|                                                            |           |    |   |
|------------------------------------------------------------|-----------|----|---|
| Toxoplasmosis                                              | 0.9879972 | 13 | 1 |
| Neurotrophin signaling pathway                             | 0.9880193 | 12 | 1 |
| mTOR signaling pathway                                     | 0.9896191 | 8  | 1 |
| mRNA surveillance pathway                                  | 0.9918225 | 23 | 1 |
| Nucleotide excision repair                                 | 0.9934617 | 8  | 1 |
| Sphingolipid signaling pathway                             | 0.9941056 | 11 | 1 |
| VEGF signaling pathway                                     | 0.9951137 | 9  | 1 |
| Gap junction                                               | 0.9965675 | 1  | 1 |
| NF-kappa B signaling pathway                               | 0.9973862 | 7  | 1 |
| Melanogenesis                                              | 0.9987607 | 13 | 1 |
| Glycosphingolipid biosynthesis - lacto and neolacto series | 0.9989954 | 2  | 1 |
| Cytokine-cytokine receptor interaction                     | 0.9995343 | 61 | 1 |
| Choline metabolism in cancer                               | 0.9995538 | 11 | 1 |
| Chagas disease (American trypanosomiasis)                  | 0.9998149 | 11 | 1 |
| Proteasome                                                 | 0.9998363 | 6  | 1 |
| Valine, leucine and isoleucine biosynthesis                | 0.9999118 | 1  | 1 |
| Huntington's disease                                       | 0.9999144 | 28 | 1 |
| Fc epsilon RI signaling pathway                            | 0.9999492 | 11 | 1 |
| Oxidative phosphorylation                                  | 0.9999511 | 11 | 1 |
| D-Glutamine and D-glutamate metabolism                     | 0.9999547 | 1  | 1 |
| Thyroid hormone synthesis                                  | 0.9999614 | 11 | 1 |
| Cell adhesion molecules (CAMs)                             | 0.9999652 | 29 | 1 |
| 2-Oxocarboxylic acid metabolism                            | 0.9999719 | 2  | 1 |
| Carbon metabolism                                          | 0.9999867 | 9  | 1 |
| Amoebiasis                                                 | 0.9999911 | 11 | 1 |
| DNA replication                                            | 0.9999984 | 5  | 1 |
| Biosynthesis of amino acids                                | 0.9999985 | 8  | 1 |
| One carbon pool by folate                                  | 0.9999993 | 1  | 1 |
| Purine metabolism                                          | 0.9999996 | 15 | 1 |
| Other types of O-glycan biosynthesis                       | 0.9999998 | 2  | 1 |
| Toll-like receptor signaling pathway                       | 0.9999999 | 10 | 1 |
| Primary bile acid biosynthesis                             | 1         | 6  | 1 |

|                          |   |    |   |
|--------------------------|---|----|---|
| Sulfur metabolism        | 1 | 2  | 1 |
| Homologous recombination | 1 | 4  | 1 |
| Salivary secretion       | 1 | 27 | 1 |

**Supplementary Table 4: miRNAs expressed at 2-fold decrease or lower in term hAECs compared to preterm hAECs**

| <b>Gene name</b> | <b>Fold change (Term Vs Preterm hAECs)</b> |
|------------------|--------------------------------------------|
| hsa-miR-520c-3p  | 0.004527985                                |
| hsa-miR-519b-3p  | 0.018013443                                |
| hsa-miR-520h     | 0.03558593                                 |
| hsa-miR-520D-3P  | 0.035845622                                |
| hsa-miR-10b      | 0.140716436                                |
| hsa-miR-145      | 0.270838877                                |
| hsa-miR-668      | 0.2731444                                  |
| hsa-miR-454      | 0.284359666                                |
| hsa-miR-409-3p   | 0.286356399                                |
| hsa-miR-29b-1    | 0.28661137                                 |
| hsa-miR-770-5p   | 0.287529871                                |
| hsa-miR-34b      | 0.287689555                                |
| hsa-miR-27a      | 0.28903032                                 |
| hsa-miR-370      | 0.356659671                                |
| hsa-miR-520e     | 0.359573349                                |
| hsa-miR-200b     | 0.361049863                                |
| hsa-miR-127-3p   | 0.362306602                                |
| hsa-miR-487b     | 0.364577643                                |
| hsa-miR-25       | 0.365880137                                |

**Supplementary Table 5: Pathways union of 2-fold decrease or lower expressed miRNAs in term hAECs compared to preterm hAECs**

| <b>KEGG pathway</b>                                      | <b>p-value</b> | <b>#genes</b> | <b>#miRNAs</b> |
|----------------------------------------------------------|----------------|---------------|----------------|
| Pathways in cancer                                       | 7.09736e-09    | 123           | 5              |
| Adherens junction                                        | 7.230013e-09   | 34            | 5              |
| Viral carcinogenesis                                     | 2.314077e-08   | 58            | 5              |
| Hippo signaling pathway                                  | 9.020322e-06   | 55            | 5              |
| Chronic myeloid leukemia                                 | 0.01043694     | 34            | 5              |
| Fatty acid metabolism                                    | 3.321574e-05   | 10            | 4              |
| Lysine degradation                                       | 0.0001861324   | 15            | 4              |
| Glioma                                                   | 0.0007934242   | 26            | 4              |
| TGF-beta signaling pathway                               | 0.00299193     | 30            | 4              |
| p53 signaling pathway                                    | 0.0153499      | 30            | 4              |
| Prostate cancer                                          | 0.04877802     | 37            | 4              |
| Bacterial invasion of epithelial cells                   | 0.07623696     | 36            | 4              |
| Thyroid hormone signaling pathway                        | 0.08919184     | 37            | 4              |
| FoxO signaling pathway                                   | 0.1396272      | 45            | 4              |
| MicroRNAs in cancer                                      | 0              | 47            | 3              |
| Fatty acid elongation                                    | 2.221477e-05   | 3             | 3              |
| Signaling pathways regulating pluripotency of stem cells | 8.977921e-05   | 42            | 3              |
| Focal adhesion                                           | 0.0009282172   | 66            | 3              |
| Colorectal cancer                                        | 0.001894819    | 27            | 3              |
| Transcriptional misregulation in cancer                  | 0.003153647    | 31            | 3              |
| Endometrial cancer                                       | 0.009056928    | 20            | 3              |
| Hepatitis B                                              | 0.009636186    | 35            | 3              |
| PI3K-Akt signaling pathway                               | 0.1100134      | 89            | 3              |
| Central carbon metabolism in cancer                      | 0.2034327      | 18            | 3              |
| Cell cycle                                               | 0.8333105      | 34            | 3              |
| Fatty acid biosynthesis                                  | 0              | 2             | 2              |
| Bladder cancer                                           | 0.008888864    | 14            | 2              |
| Fatty acid degradation                                   | 0.1516373      | 6             | 2              |
| Melanoma                                                 | 0.1939439      | 16            | 2              |
| Small cell lung cancer                                   | 0.2118684      | 29            | 2              |
| Amoebiasis                                               | 0.252933       | 27            | 2              |

|                                                                         |           |    |   |
|-------------------------------------------------------------------------|-----------|----|---|
| Wnt signaling pathway                                                   | 0.3382355 | 27 | 2 |
| Protein processing in endoplasmic reticulum                             | 0.5435447 | 18 | 2 |
| Non-small cell lung cancer                                              | 0.5459003 | 15 | 2 |
| Pancreatic cancer                                                       | 0.6407905 | 20 | 2 |
| Renal cell carcinoma                                                    | 0.800708  | 18 | 2 |
| ErbB signaling pathway                                                  | 0.8720876 | 22 | 2 |
| Axon guidance                                                           | 0.9803328 | 20 | 2 |
| Endocytosis                                                             | 0.1280316 | 21 | 1 |
| Ubiquitin mediated proteolysis                                          | 0.366851  | 23 | 1 |
| HTLV-I infection                                                        | 0.6535317 | 36 | 1 |
| Arrhythmogenic right ventricular cardiomyopathy (ARVC)                  | 0.7019688 | 12 | 1 |
| Thyroid cancer                                                          | 0.8192068 | 4  | 1 |
| Cell adhesion molecules (CAMs)                                          | 0.8207323 | 1  | 1 |
| HIF-1 signaling pathway                                                 | 0.8268555 | 12 | 1 |
| N-Glycan biosynthesis                                                   | 0.8416644 | 1  | 1 |
| Prolactin signaling pathway                                             | 0.8454987 | 15 | 1 |
| Oocyte meiosis                                                          | 0.8486408 | 17 | 1 |
| AMPK signaling pathway                                                  | 0.9244279 | 3  | 1 |
| Neurotrophin signaling pathway                                          | 0.9315332 | 14 | 1 |
| Glycosaminoglycan degradation                                           | 0.9651712 | 3  | 1 |
| Rap1 signaling pathway                                                  | 0.9888523 | 1  | 1 |
| Pathogenic Escherichia coli infection                                   | 0.9919459 | 7  | 1 |
| Inflammatory bowel disease (IBD)                                        | 0.9962719 | 7  | 1 |
| Dorso-ventral axis formation                                            | 0.9977154 | 6  | 1 |
| Ras signaling pathway                                                   | 0.9978458 | 23 | 1 |
| Glycosaminoglycan biosynthesis - chondroitin sulfate / dermatan sulfate | 0.9984241 | 1  | 1 |
| Huntington's disease                                                    | 0.9991098 | 7  | 1 |
| Steroid biosynthesis                                                    | 0.9992379 | 3  | 1 |
| Mucin type O-Glycan biosynthesis                                        | 0.9995166 | 1  | 1 |
| Dilated cardiomyopathy                                                  | 0.9999237 | 13 | 1 |
| Fc gamma R-mediated phagocytosis                                        | 0.999948  | 11 | 1 |
| Pyrimidine metabolism                                                   | 0.9999537 | 7  | 1 |
| Other glycan degradation                                                | 0.9999543 | 1  | 1 |

|                                                            |           |    |   |
|------------------------------------------------------------|-----------|----|---|
| Inositol phosphate metabolism                              | 0.9999657 | 1  | 1 |
| Hypertrophic cardiomyopathy (HCM)                          | 0.9999665 | 12 | 1 |
| Valine, leucine and isoleucine degradation                 | 0.9999786 | 5  | 1 |
| Leukocyte transendothelial migration                       | 0.9999984 | 13 | 1 |
| Other types of O-glycan biosynthesis                       | 0.9999994 | 2  | 1 |
| Glycosphingolipid biosynthesis - lacto and neolacto series | 0.9999998 | 2  | 1 |
| Sulfur metabolism                                          | 1         | 2  | 1 |
